# Supplementary material for: Prkdc participates in mitochondrial genome maintenance and prevents Adriamycin-induced nephropathy in mice
Source: JCI journal article supplement (doi:10.1172/jci43721), 2010-11-01
Supplement: sd1 [file 1]

## Supplemental data and figures

### Supplemental Table.

Table1. Primer sequences for qPCR and Southern blot probes.

| Gene             | Forward primer       | Reverse primer          |
|------------------|----------------------|-------------------------|
| Cox1(probe)      | TGCTAGCCGCAGGCATTACT | CGGGATCAAAGAAAGTTGTGTTT |
| 18S rRNA (probe) | ATCCTGCCAGTAGCATATGC | TCTGATCGTCTTCGAACCTC    |
| Cox1             | GCCTTTCAGGAATACCACGA | AGGTTGGTTCCTCGAATGTG    |
| 18S rRNA         | TCGATGCTCTTAGCTGAGT  | TCTGATCGTCTTCGAACCTC    |

## Supplemental Figures

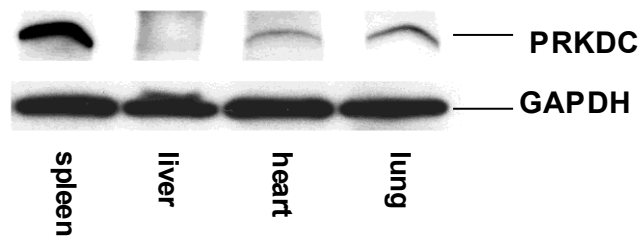

**Figure1.**

**Marked variation in PRKDC protein level in different tissues of B6 strain.**

Positions of PRKDC and GAPDH (loading control) are indicated by bars. 100ug of total protein per well were loaded for each tissue.

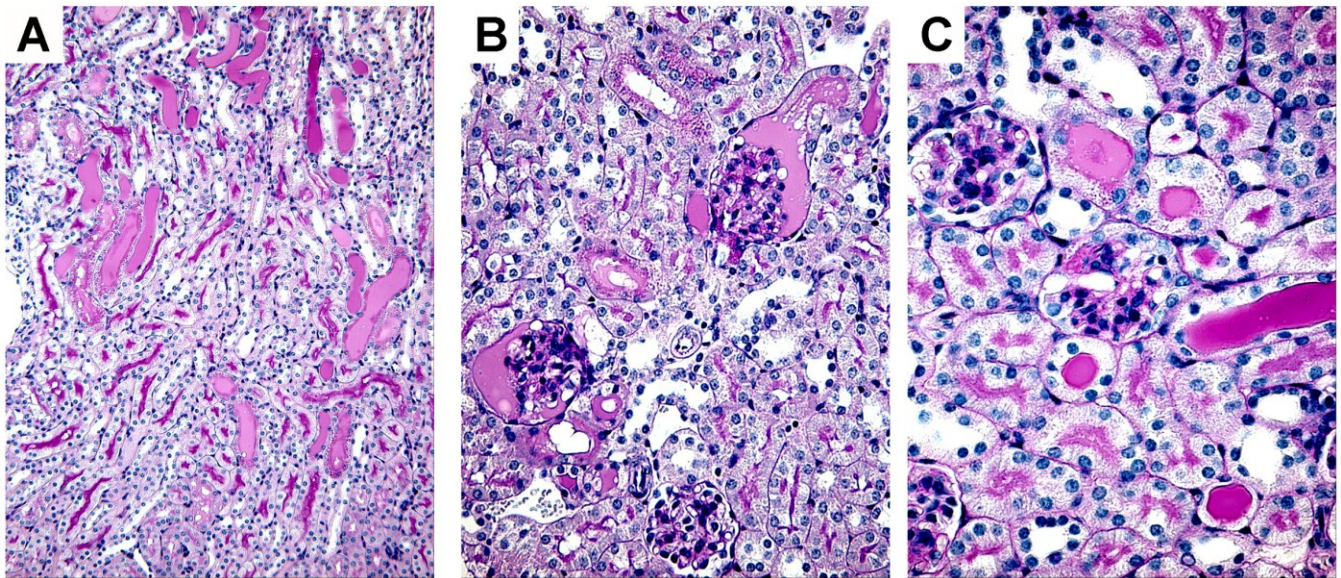

**Figure2.**

**ADR-induced nephropathy in Cb.17 mice, carrying *Prkdc*<sup>SCID</sup> mutation.**

Renal histopathology shows tubular proteinaceous casts (A, C) and glomerulosclerosis (B, C) at 200x (A, B) and 600x (C) magnifications.

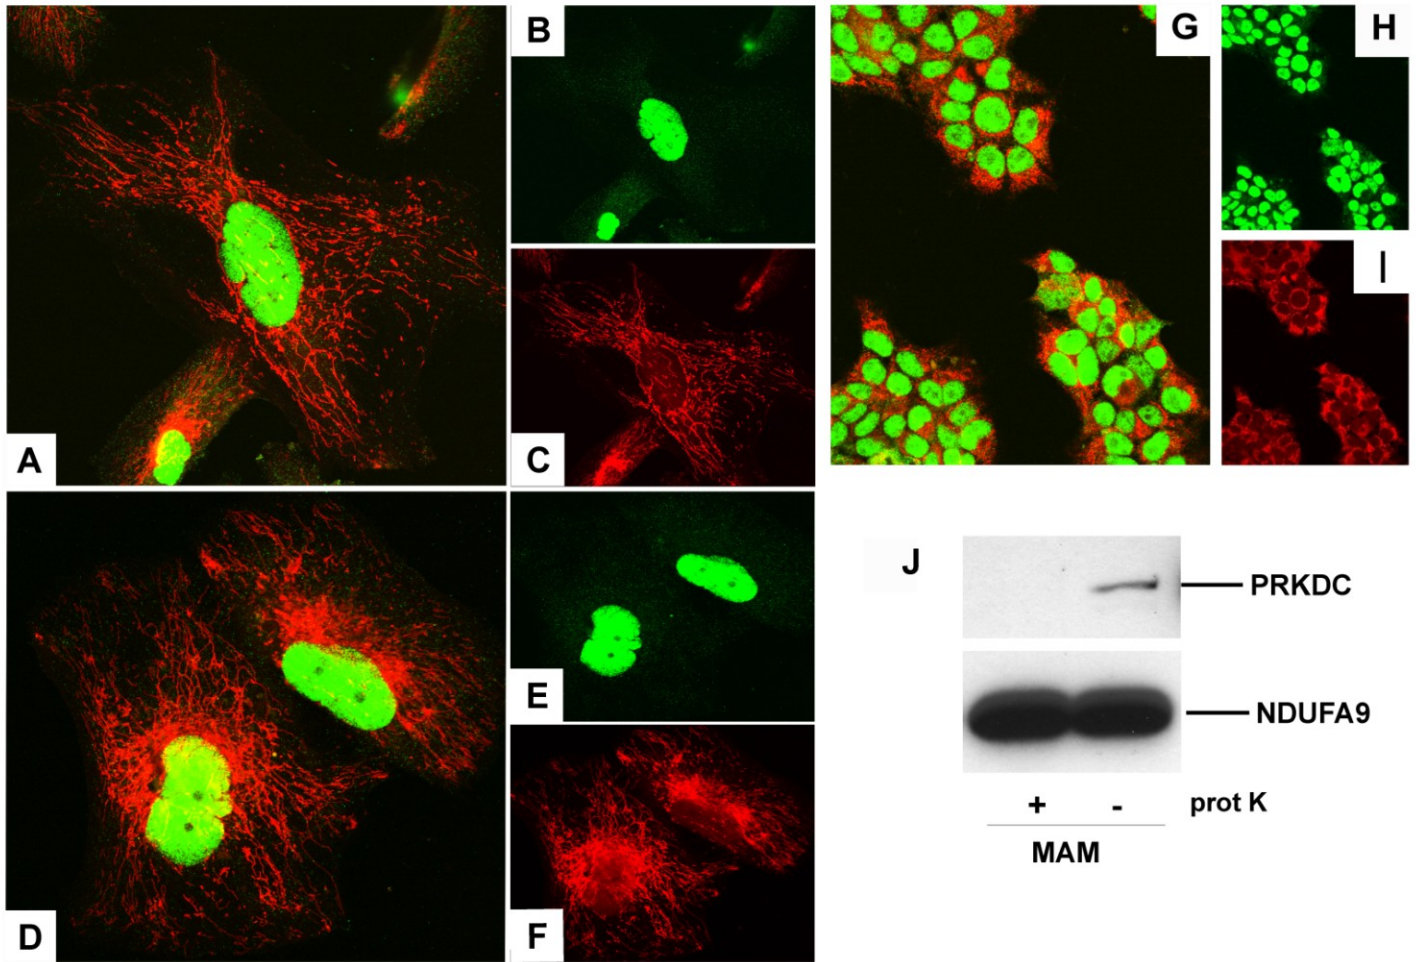

**Figure3.**

**Nuclear and not mitochondrial localization of PRKDC.**

**A-F.** Confocal microscopy shows nuclear localization of PRKDC (green) and absence of its co-localization with mitochondrial marker Mitotraker Red in control (**A-C**) or ADR treated (**D-F**) podocytes and in 293HEK cells (**G-I**). **J.** Western blot of mitochondrial fractions from human kidney shows no PRKDC in the proteinase K treated sample.

“MAM” corresponds to the membrane-associated mitochondria. NDUFA9 (Complex I-39 kD) is an inner mitochondrial membrane protein which was used as a control for mitochondrial integrity and loading. As the detection level of NDUFA9 has not been changed by the Proteinase K treatment, disappearance of PRKDC post treatment could exclude localization of PRKDC inside the mitochondria, which is necessary for its direct function in mtDNA repair.



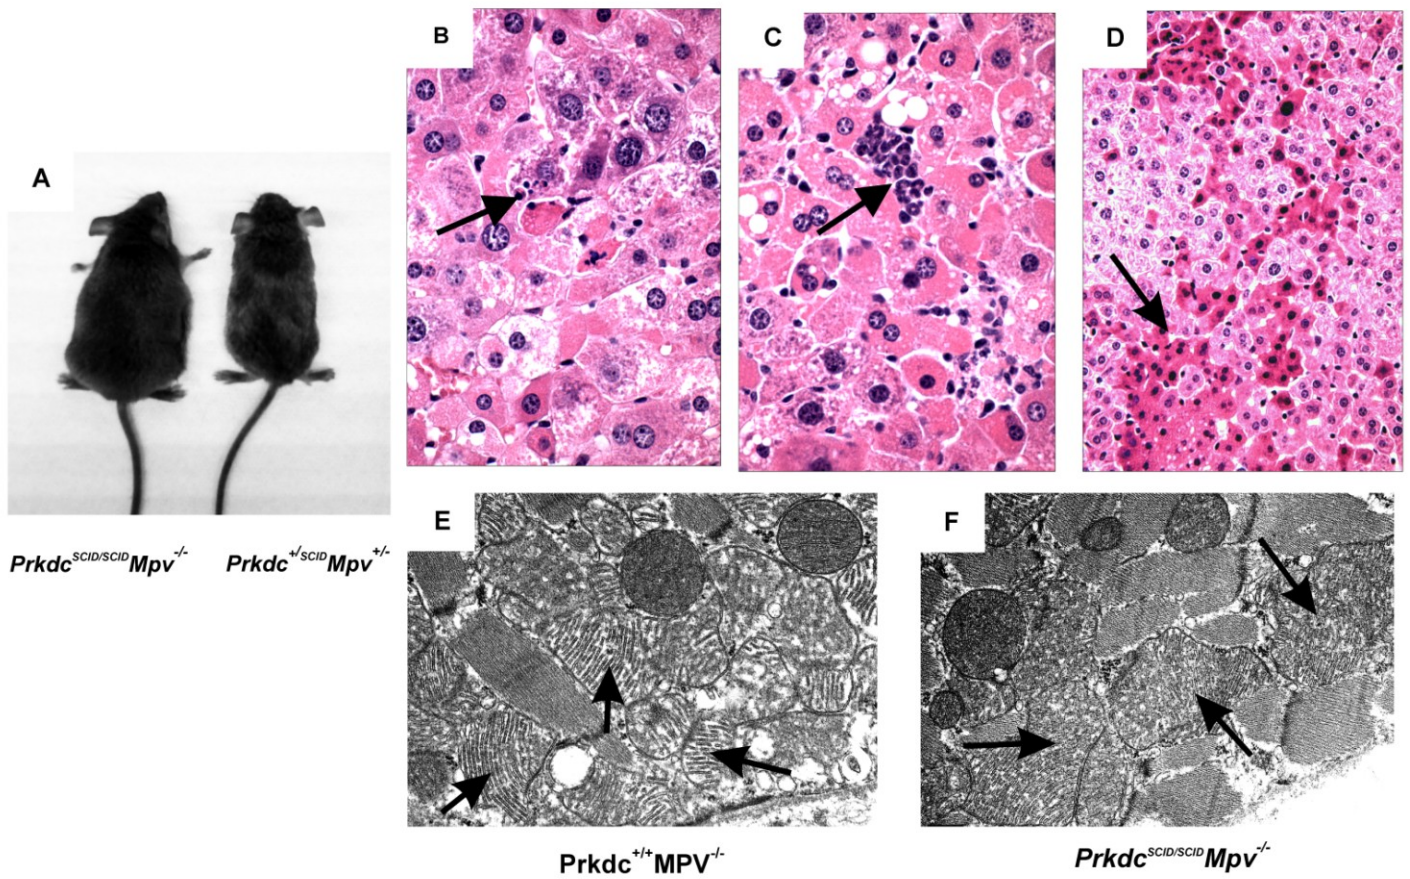

**Figure4.**

**Additional clinical phenotypes observed in the Cb17xMPV17 cross.**

**A.** Ascites, observed in a double null mouse, compared to a normal littermate. **B-D.** Liver histopathology shows a variety of lesions: apoptosis (**B**), inflammation (**C**), hypereosinophilia (**D**). **E-F.** Electron microscopy of heart tissue shows defects in mitochondrial architecture in double null mice (**E**), but not in Mpv17 null mice (**F**). Mitochondria are indicated by arrows.

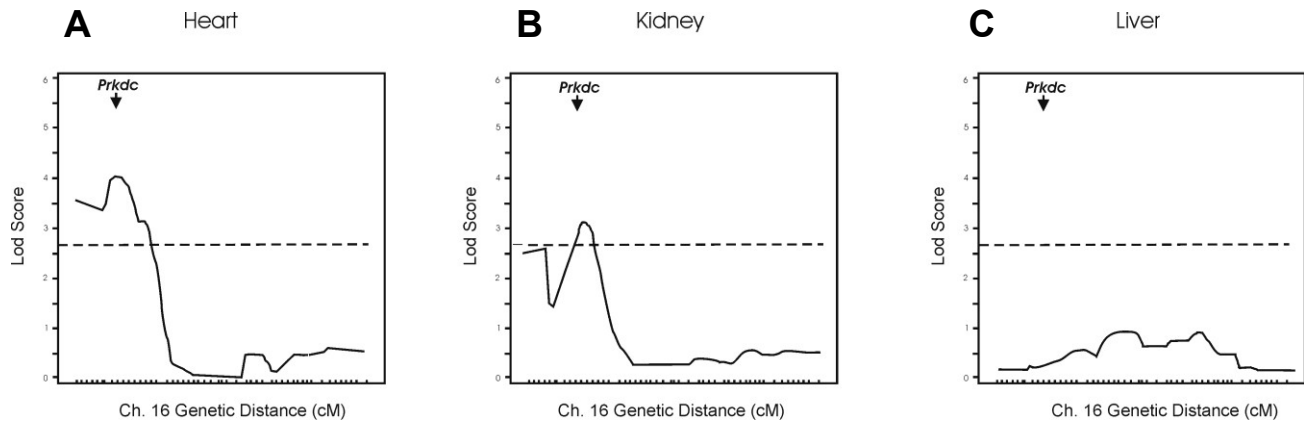

**Figure 5.**

**Lod plots of mouse chromosome 16 show linkage of mtDNA levels to the *Prkdc* locus in the heart (A), kidney (B), but not liver (C) tissues of mice from the intercross *Mpv17* x *Cb17* intercross.**

The Y axis shows the lod score. The X-axis shows the genetic distance on chromosome 16 (cM). The dashed line represents the lod score of 3, which is the traditional threshold for genome-wide significance.
